# Supplementary material
Source: Royal Society of Chemistry journal article supplement (https://www.rsc.org/suppdata/p2/1998/1767/e802583.doc)
Supplement: Supplementary file 1 [file e802583.doc]

**Table** Conditions of the HPLC analyses for determination of e.e. of 2-arylalkanoic acids **4**–**6**

| Racemic  Acid | HPLC Column  (Daicel Chiralcel) | Eluent | Flow rate  (mL/min) |
| --- | --- | --- | --- |
| **4a** | OJ-R | Phosphate buffer*b*/CH3CN = 7/3 | 0.5 |
| **5a** | OJ-R | Phosphate buffer*b*/CH3CN = 7/3 | 0.5 |
| **6a** | OJ-R | Phosphate buffer*b*/CH3CN = 7/3 | 0.5 |
| **7a***a* | OD | Hexane | 1.0 |
| **4b***a* | OB | Hexane | 1.0 |
| **4c***a* | OD | Hexane | 1.0 |
| **4d***a* | OD | Hexane | 1.0 |
| **5b***a* | OD | Hexane | 1.0 |
| **5c***a* | OJ-R | Phosphate buffer*b*/CH3CN = 7/3 | 1.0 |
| **5d***a* | OD | Hexane | 1.0 |

*a*The acid was converted to the corresponding methyl ester by treatment with diazomethane.

*b*pH 2 0.5M H3PO4-KH2PO4 buffer.

Supplementary Material

K. Kinbara, Y. Kobayashi, K. Saigo
